# Supplementary material
Source: Springer Nature journal article supplement (https://www.springermedizin.de/resource/supplementary/12885_2012_3799_MOESM3_ESM.pdf/9464478)
Supplement: MOESM3 [file 9464478]

**Supplementary Table 3 – Primer pairs used for *KRAS* mutation analysis and correspondent amplicon lengths.**

| <b><i>KRAS</i> exon 3</b> |                                          |
|---------------------------|------------------------------------------|
| Forward primer sequence   | 5' CCA GAC TGT GTT TCT CCC TTC TCA GG 3' |
| Reverse primer sequence   | 5' AGA AAG CCC TCC CCA GTC CTC A 3'      |
| Amplicon length           | 150 bp                                   |
| <b><i>KRAS</i> exon 4</b> |                                          |
| Forward primer sequence   | 5' ACAGGCTCAGGACTTAGCAAGAAGT 3'          |
| Reverse primer sequence   | 5' AGCATAATTGAGAGAAAACTGA 3'             |
| Amplicon length           | 158 bp                                   |
